# Supplementary material
Source: PubMed Central journal article supplement (PMC8251650)
Supplement: jamaotolaryngolheadnecksurg-e211276-s001.pdf [file jamaotolaryngolheadnecksurg-e211276-s001.pdf]

## Supplementary Online Content

Grove CR, Whitney SL, Pyle GM, Heiderscheid BC. Instrumented gait analysis to identify persistent deficits in gait stability in adults with chronic vestibular loss. *JAMA Otolaryngol Head Neck Surg*. Published online July 1, 2021. doi:10.1001/jamaoto.2021.1276

**eAppendix 1.** Criteria for a Diagnosis of Vestibular Hypofunction

**eAppendix 2.** Additional Information Regarding Tests and Measures

**eTable 1.** Results of the Correlational Analyses

**eTable 2.** Individual Data for Healthy Adults

**eTable 3.** Individual Data for Adults with Vestibular Loss

**eFigure.** Individual-level Stride Length and Peak Turn Velocity Data

**eReferences**

This supplementary material has been provided by the authors to give readers additional information about their work.

## **eAppendix 1. Criteria for a Diagnosis of Vestibular Hypofunction**

Diagnosis of vestibular hypofunction was confirmed with videonystagmography and/or rotational chair testing.<sup>1</sup> A caloric weakness of  $\geq 25\%$  was required to confirm a diagnosis of unilateral vestibular hypofunction. A bilateral vestibular hypofunction was diagnosed by videonystagmography when the caloric tests did not reach the 25% criteria for indicating a unilateral weakness, warm irrigations produced nystagmus that was  $\leq 10$  °/s, each cool caloric produced nystagmus that was  $\leq 5$  °/s, and the total of all four caloric tests was  $\leq 30$  °/s. On rotational chair testing, a bilateral hypofunction was diagnosed if there was abnormally low gain for at least two adjacent frequencies (e.g. 0.01-0.02 Hz) of the slow harmonic acceleration test.

## **eAppendix 2. Additional Information Regarding Tests and Measures**

### **Clinical Examination**

The physical exam was conducted by a physical therapist with 27 years of experience in neurological and vestibular rehabilitation. Tests of lower extremity sensorimotor function included touch/pressure sensation (5.07-gram Semmes Weinstein filament), joint position sense, vibratory sensation (128 Hz tuning fork), range of motion, heel-to-shin coordination, and rapid alternating movements. Determination of adequate range of motion was based on visual observation of passive range of motion. Performance on the Five Times Sit to Stand Test<sup>2</sup> was used to determine if participants had normal lower extremity functional strength. Cervical spine clearing (active range of motion, as well as tests for the integrity of the alar and transverse ligaments) was performed before tests involving head movement. Tests of ocular alignment (cover, uncover, alternate cover, Maddox Rod tests, and near point of convergence), oculomotor function (ductions, versions, smooth pursuit, saccades, and vestibular-ocular reflex suppression), nystagmus tests (spontaneous and gaze-evoked nystagmus in room light and spontaneous nystagmus and end-gaze nystagmus with fixation removed), as well as vestibular-ocular function (vestibular-ocular reflex with slow head movements, head impulse test,<sup>3</sup> after-head-shaking-nystagmus,<sup>4</sup> vibration-induced nystagmus,<sup>5</sup> and the non-instrumented dynamic visual acuity test<sup>6</sup> were also performed with all participants. Digital, infrared video-oculography was utilized for oculomotor and vestibular-ocular tests, except dynamic visual acuity testing. Participants who used spectacles wore these when video-oculography was not in use. No healthy adults had evidence of vestibular dysfunction.

### **Self-report Measures**

The Activities-specific Balance Confidence Scale<sup>7</sup> is a 16-question survey that respondents complete by answering each item by indicating how confident they feel about not becoming unsteady or falling. Scores for each item range from 0% to 100%. Higher scores indicate greater confidence.

The Dizziness Handicap Inventory<sup>8</sup> is a 25-question survey that is used to document how often dizziness has affected physical or emotional health or is experienced in functional situations. Respondents answer each

question as “always” = 4 points, “sometimes” = 2 points, or “never” = 0 points to indicate how often dizziness is present. The total score ranges from 0 to 100 points. Higher scores indicate greater perceived handicap.

The Visual Vertigo Analogue Scale<sup>9</sup> is a 9-item survey that is used to assess the intensity of visually induced dizziness. Each question is presented as a visual analog scale with two anchors, 0 (no dizziness) and 10 (extreme dizziness or activity avoidance). The mean score for the VVAS ranges from 0 to 100. Higher scores indicate greater severity of symptoms.

The Vestibular Activities and Participation Measure<sup>10</sup> is a 34-item questionnaire that is used to measure the impact of vestibular loss on focusing attention, moving from sitting to standing, walking on different surfaces, operating a vehicle, shopping, maintaining a job, etc. Responses are scored as “none” = 0 points, “moderate” = 2 points, “severe” = 3 points, or “unable to do” = 4 points. The mean score ranges from 0 to 4. The average score is calculated based on responses to each question that is answered. Higher scores indicate greater impact of vestibular dysfunction on daily activities and participation in life roles.

### **Capacity-based Measures**

The non-instrumented Dynamic Visual Acuity Test was performed in sitting and with best corrected vision.<sup>11-13</sup> An Early Treatment Diabetic Retinopathy Study eye chart was used to establish static (head still) visual acuity first. Then, dynamic (head moving) visual acuity was established while the participant’s head was passively moved by the examiner at 2 Hz. A metronome was used to facilitate appropriate pacing of the head movement. Results are reported as the number of lines lost, i.e., the raw difference between static and dynamic visual acuity.

The Sensory Organization Test<sup>14</sup> is a component of computerized dynamic posturography (Bertec Balance Advantage, Bertec, Corp, Columbus, OH, USA) and is used to assess the influence of sensory input on standing balance. Composite scores are an overall measure of performance and range from 0 to 100. Higher scores indicate better balance.

The Functional Gait Assessment<sup>15</sup> was performed in a clinic hallway with markings that facilitate scoring embedded in the flooring pattern. The test was conducted in accordance with the original test instructions. Standardized obstacles were used for FGA item 6 (Step Over Obstacle task) and the same set of stairs was used for FGA item 10 (Stair Climbing task). A stopwatch was used to record times for FGA item 1 (Walking, Eyes Open

task) and FGA item 8 (Walking, Eyes Closed task). Participants wore their preferred, flat-soled shoes. Rest between tasks was provided if requested by participants.

The instrumented 2-minute Walk Test<sup>16</sup> was conducted in a vacant rehabilitation gym. The instructions to participants were standardized as follows. “Stand quietly and looking forward with your legs straight, feet pointed forward, and arms at your sides. Remain still until you hear the long tone. When you hear the long tone, start walking at a natural and comfortable pace. Continue walking along the path, turning around 180° at either end. When you hear the second, long tone, stop walking and then remain still.”

The inertial measurement units include a 3-axis accelerometer, a 3-axis gyro, a 3-axis magnetometer, and a temperature sensor (Mobility Lab, APDM, Inc., Portland, OR, USA; hardware version 1.0, software version 2.0). These wearable sensors weight < 25 grams each and were wirelessly synchronized with each other. Data are sampled at 128 Hertz. Each inertial measurement unit has a storage capacity of 8 gigabytes.

#### Definitions:

*Gait Cycle:* The time elapsed from one heel contact to the next heel contact of the same foot.

*Gait Velocity:* The forward distance traveled during a gait cycle divided by the duration of that gait cycle.

*Cadence:* The number of steps per minute.

*Double Support:* The percentage of the gait cycle during which both feet are in contact with the ground.

*Stride Length:* The forward distance traveled by either foot during a gait cycle.

*Turn Angle:* The rotational angle of a turn in the transverse plane.

*Turn Duration:* The time elapsed during the turn.

*Peak Turn Velocity:* The peak angular velocity of the turn in the transverse plane.

*Mean Turn Velocity:* The rotational angle of the turn divided by the turn duration.

**eTable 1.** Results of the Correlational Analyses

| Measure                                                                                                                                                                                                                                                                                                     | N  | Pearson's <i>r</i> (95% CI) | ES (95% CI)          |
|-------------------------------------------------------------------------------------------------------------------------------------------------------------------------------------------------------------------------------------------------------------------------------------------------------------|----|-----------------------------|----------------------|
| <b>Stride Length (left)</b>                                                                                                                                                                                                                                                                                 |    |                             |                      |
| ABCS (Mean Score)                                                                                                                                                                                                                                                                                           | 30 | 0.40 (0.04, 0.66)           | 0.87 (0.08, 1.67)    |
| DHI (Total score)                                                                                                                                                                                                                                                                                           | 30 | -0.47 (-0.71, -0.14)        | -1.06 (-1.89, -0.24) |
| VVAS (Mean Score)                                                                                                                                                                                                                                                                                           | 30 | -0.40 (-0.67, -0.05)        | -0.87 (-1.67, -0.08) |
| DVAT (Horizontal)                                                                                                                                                                                                                                                                                           | 30 | -0.39 (-0.65, -0.03)        | -0.85 (-1.64, -0.06) |
| DVAT (Vertical)                                                                                                                                                                                                                                                                                             | 30 | -0.39 (-0.66, -0.03)        | -0.85 (-1.64, -0.06) |
| SOT (Composite)                                                                                                                                                                                                                                                                                             | 30 | 0.51 (0.18, 0.73)           | 1.19 (0.34, 2.03)    |
| FGA (Total)                                                                                                                                                                                                                                                                                                 | 30 | 0.57 (0.26, 0.77)           | 1.39 (0.5, 2.27)     |
| <b>Stride Length (right)</b>                                                                                                                                                                                                                                                                                |    |                             |                      |
| ABCS (Mean Score)                                                                                                                                                                                                                                                                                           | 30 | 0.45 (0.10, 0.70)           | 1.01 (0.19, 1.82)    |
| DHI (Total score)                                                                                                                                                                                                                                                                                           | 30 | -0.52 (-0.74, -0.20)        | -1.22 (-2.07, -0.37) |
| VVAS (Mean Score)                                                                                                                                                                                                                                                                                           | 30 | -0.36 (-0.64, 0.00)         | -0.77 (-1.55, 0.01)  |
| DVAT (Horizontal)                                                                                                                                                                                                                                                                                           | 30 | -0.43 (-0.68, -0.08)        | -0.95 (-1.76, -0.15) |
| DVAT (Vertical)                                                                                                                                                                                                                                                                                             | 30 | -0.43 (-0.68, -0.08)        | -0.95 (-1.76, -0.15) |
| SOT (Composite)                                                                                                                                                                                                                                                                                             | 30 | 0.57 (0.26, 0.77)           | 1.39 (0.5, 2.27)     |
| FGA (Total)                                                                                                                                                                                                                                                                                                 | 30 | 0.62 (0.33, 0.8)            | 1.58 (0.65, 2.51)    |
| <b>Peak Turn Velocity</b>                                                                                                                                                                                                                                                                                   |    |                             |                      |
| ABCS (Mean Score)                                                                                                                                                                                                                                                                                           | 30 | 0.57 (0.26, 0.77)           | 1.39 (0.5, 2.27)     |
| DHI (Total score)                                                                                                                                                                                                                                                                                           | 30 | -0.66 (-0.83, -0.4)         | -1.76 (-2.73, -0.79) |
| VVAS (Mean Score)                                                                                                                                                                                                                                                                                           | 30 | -0.38 (-0.65, -0.02)        | -0.82 (-1.61, -0.03) |
| DVAT (Horizontal)                                                                                                                                                                                                                                                                                           | 30 | -0.63 (-0.81, -0.35)        | -1.62 (-2.56, -0.69) |
| DVAT (Vertical)                                                                                                                                                                                                                                                                                             | 30 | -0.61 (-0.79, -0.32)        | -1.54 (-2.46, -0.62) |
| SOT (Composite)                                                                                                                                                                                                                                                                                             | 30 | 0.63 (0.36, 0.81)           | 1.62 (0.69, 2.56)    |
| FGA (Total)                                                                                                                                                                                                                                                                                                 | 30 | 0.68 (0.42, 0.83)           | 1.85 (0.86, 2.85)    |
| Abbreviations: CI, confidence interval; ES, effect size (Cohen's <i>d</i> ); ABCS, Activities-specific Balance Confidence Scale; DHI, Dizziness Handicap Inventory; VVAS, Visual Vertigo Analogue Scale; DVAT, dynamic visual acuity test; SOT, Sensory Organization Test; FGA, Functional Gait Assessment. |    |                             |                      |

**eTable 2.** Individual Data for Healthy Adults

| Age <sup>a</sup> | Gender | Lesion  | Fall Hx | ABCS | DHI | VVAS | VAPM | FGA | SOT  | SL (L) | SL (R) | PTV |
|------------------|--------|---------|---------|------|-----|------|------|-----|------|--------|--------|-----|
| 31.50            | Male   | Healthy | No      | 100  | 0   | 0    | NA   | 29  | 85.1 | 1.22   | 1.21   | 179 |
| 35.52            | Male   | Healthy | No      | 100  | 0   | 0    | NA   | 30  | 86.1 | 1.67   | 1.68   | 198 |
| 42.41            | Male   | Healthy | No      | 100  | 0   | 0    | NA   | 29  | 84.9 | 1.48   | 1.48   | 233 |
| 22.92            | Female | Healthy | No      | 98   | 0   | 0    | NA   | 30  | 81.5 | 1.50   | 1.49   | 187 |
| 27.83            | Female | Healthy | No      | 99   | 0   | 0    | NA   | 29  | 85.5 | 1.39   | 1.38   | 273 |
| 28.66            | Female | Healthy | No      | 99   | 0   | 0    | NA   | 30  | 90.7 | 1.51   | 1.50   | 316 |
| 30.03            | Female | Healthy | No      | 99   | 0   | 0    | NA   | 29  | 86.0 | 1.28   | 1.28   | 277 |
| 31.55            | Female | Healthy | No      | 99   | 0   | 0    | NA   | 29  | 79.9 | 1.39   | 1.39   | 191 |
| 35.34            | Female | Healthy | No      | 99   | 0   | 0    | NA   | 30  | 83.2 | 1.25   | 1.25   | 240 |
| 36.28            | Female | Healthy | No      | 100  | 0   | 0    | NA   | 30  | 86.7 | 1.62   | 1.60   | 254 |
| 39.67            | Female | Healthy | No      | 98   | 0   | 0    | NA   | 30  | 84.9 | 1.53   | 1.53   | 275 |
| 40.76            | Female | Healthy | No      | 98   | 0   | 15   | NA   | 29  | 81.7 | 1.36   | 1.36   | 252 |
| 41.20            | Female | Healthy | No      | 100  | 0   | 0    | NA   | 28  | 87.2 | 1.44   | 1.44   | 235 |
| 53.02            | Female | Healthy | No      | 100  | 0   | 0    | NA   | 30  | 76.7 | 1.56   | 1.55   | 287 |
| 53.68            | Female | Healthy | No      | 100  | 0   | 0    | NA   | 30  | 80.7 | 1.47   | 1.43   | 364 |
| 65.28            | Female | Healthy | No      | 96   | 0   | 0    | NA   | 27  | 80.8 | 1.38   | 1.37   | 204 |
| 51.98            | Male   | Healthy | Yes     | 100  | 0   | 0    | NA   | 30  | 88.6 | 1.63   | 1.62   | 259 |

Abbreviations: Hx, history; ABCS, Activities-specific Balance Confidence Scale (average score); DHI, Dizziness Handicap Inventory (total score); VVAS, Visual Vertigo Analogue Scale (average score); Vestibular Activities and Participation Measure (average score); FGA, Functional Gait Assessment (total score); SOT, Sensory Organization Test (composite score); SL, stride length (meters); L, left; R, right; PTV, peak turn velocity (degrees per second).

<sup>a</sup> = Age is reported in years.

**eTable 3.** Individual Data for Adults With Vestibular Loss

| Age <sup>a</sup> | Gender | Lesion    | Fall Hx | ABCS | DHI | VVAS | VAPM | FGA | SOT  | SL (L) | SL(R) | PTV |
|------------------|--------|-----------|---------|------|-----|------|------|-----|------|--------|-------|-----|
| 67.86            | Male   | Left      | No      | 66   | 44  | 39   | 3.14 | 24  | 70.5 | 1.36   | 1.37  | 139 |
| 51.64            | Female | Left      | No      | 86   | 36  | 19   | 0.70 | 28  | 77.8 | 1.42   | 1.39  | 212 |
| 50.80            | Male   | Left      | Yes     | 94   | 28  | 15   | 0.57 | 29  | 54.9 | 1.19   | 1.18  | 202 |
| 54.64            | Male   | Right     | No      | 98   | 14  | 0    | 0.14 | 29  | 79.7 | 1.33   | 1.32  | 216 |
| 79.67            | Female | Right     | No      | 96   | 24  | 33   | 0.38 | 25  | 73.9 | 1.26   | 1.25  | 193 |
| 46.80            | Male   | Right     | Yes     | 89   | 12  | 0    | 0.14 | 30  | 83.2 | 1.44   | 1.42  | 222 |
| 70.55            | Male   | Right     | Yes     | 95   | 16  | 0    | 0.16 | 21  | 67.9 | 1.40   | 1.38  | 153 |
| 71.28            | Female | Right     | Yes     | 94   | 36  | 15   | 0.96 | 23  | 74.1 | 1.10   | 1.11  | 170 |
| 63.82            | Male   | Bilateral | No      | 61   | 32  | 0    | 1.00 | 15  | 16.1 | 1.44   | 1.32  | 157 |
| 45.50            | Female | Bilateral | No      | 73   | 28  | 60   | 0.91 | 20  | 60.0 | 1.38   | 1.38  | 213 |
| 63.50            | Female | Bilateral | No      | 99   | 22  | 0    | 0.52 | 20  | 46.6 | 1.17   | 1.17  | 177 |
| 68.12            | Female | Bilateral | No      | 96   | 6   | 0    | 0.21 | 26  | 74.8 | 1.26   | 1.26  | 226 |
| 52.32            | Male   | Bilateral | Yes     | 45   | 80  | 54   | 1.43 | 16  | 60.6 | 1.33   | 1.31  | 165 |

Abbreviations: Hx, history; ABCS, Activities-specific Balance Confidence Scale (average score); DHI, Dizziness Handicap Inventory (total score); VVAS, Visual Vertigo Analogue Scale (average score); Vestibular Activities and Participation Measure (average score); FGA, Functional Gait Assessment (total score); SOT, Sensory Organization Test (composite score); SL, stride length (meters); L, left; R, right; PTV, peak turn velocity (degrees per second).

<sup>a</sup>= Age is reported in years.



**eFigure.** Individual-Level Stride Length and Peak Turn Velocity Data

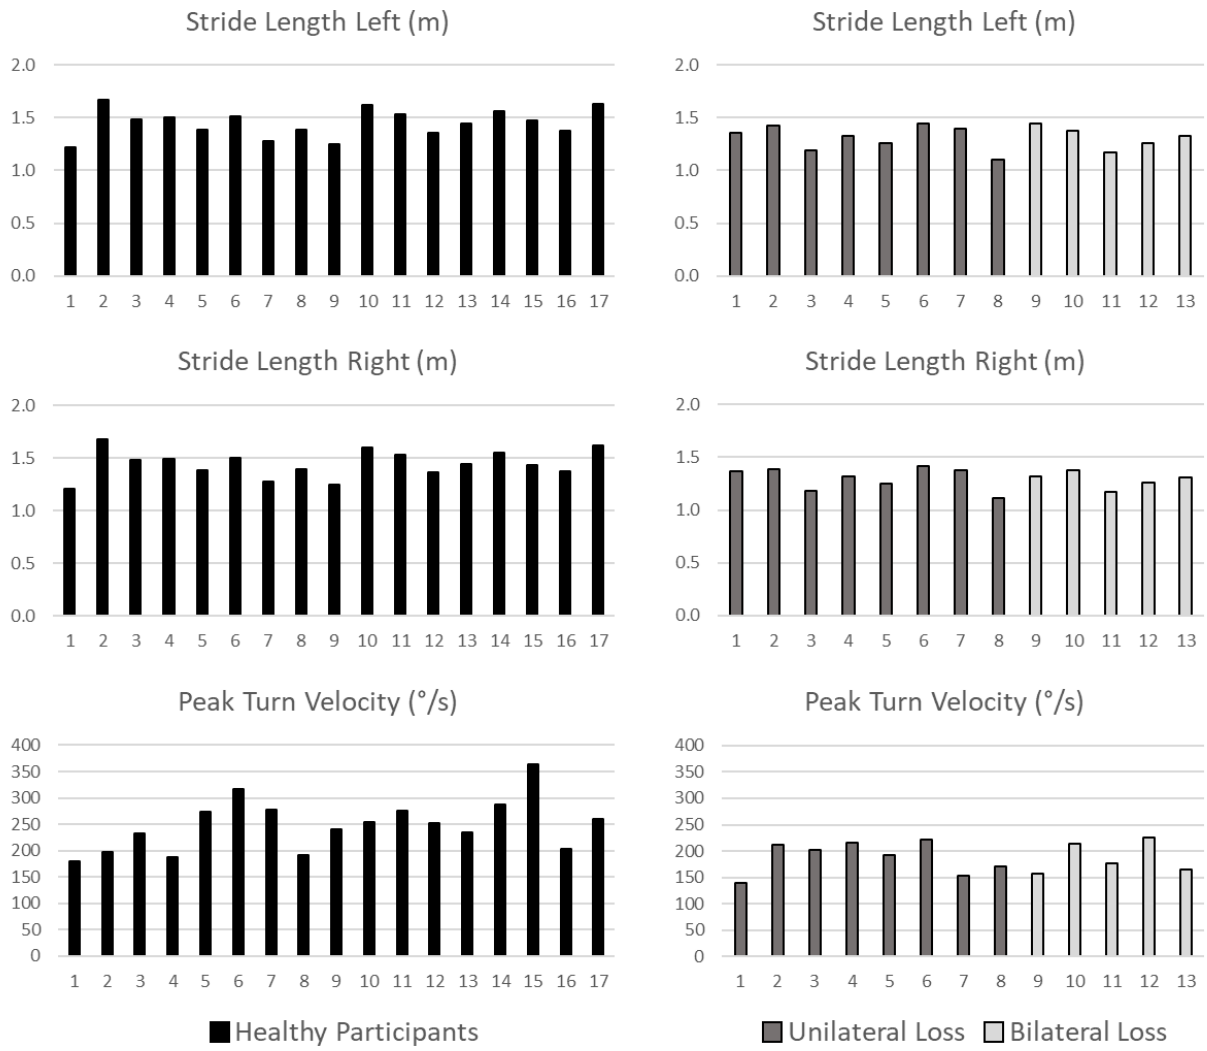

Abbreviations: m, meters; °/s, degrees per second.

## eReferences

1. Barber HO, Stockwell CW. *Manual of electronystagmography*. St. Louis: C.W. Mosby; 1980.
2. Bohannon RW, Bubela DJ, Magasi SR, Wang YC, Gershon RC. Sit-to-stand test: Performance and determinants across the age-span. *Isokinetics and exercise science*. 2010;18(4):235-240.
3. Halmagyi GM, Curthoys IS, Cremer PD, et al. The human horizontal vestibulo-ocular reflex in response to high-acceleration stimulation before and after unilateral vestibular neurectomy. *Exp Brain Res*. 1990;81(3):479-490.
4. Hain TC, Fetter M, Zee DS. Head-shaking nystagmus in patients with unilateral peripheral vestibular lesions. *Am J Otolaryngol*. 1987;8(1):36-47.
5. Dumas G, Perrin P, Schmerber S. Nystagmus induced by high frequency vibrations of the skull in total unilateral peripheral vestibular lesions. *Acta Otolaryngol*. 2008;128(3):255-262.
6. Longridge NS, Mallinson AI. The Dynamic Illegible E-test: A Technique for Assessing the Vestibulo-ocular Reflex. *Acta Otolaryngol*. 1987;103(5-6):273-279.
7. Powell LE, Myers AM. The Activities-specific Balance Confidence (ABC) Scale. *J Gerontol A Biol Sci Med Sci*. 1995;50a(1):M28-34.
8. Jacobson GP, Newman CW. The development of the Dizziness Handicap Inventory. *Archives of otolaryngology--head & neck surgery*. 1990;116(4):424-427.
9. Dannenbaum E, Chilingaryan G, Fung J. Visual vertigo analogue scale: an assessment questionnaire for visual vertigo. *J Vestib Res*. 2011;21(3):153-159.
10. Alghwiri A, Alghadir A, Whitney SL. The vestibular activities and participation measure and vestibular disorders. *J Vestib Res*. 2013;23(6):305-312.
11. Longridge NS, Mallinson AI. The dynamic illegible E (DIE) test: a simple technique for assessing the ability of the vestibulo-ocular reflex to overcome vestibular pathology. *The Journal of otolaryngology*. 1987;16(2):97-103.
12. Dannenbaum E, Paquet N, Chilingaryan G, Fung J. Clinical evaluation of dynamic visual acuity in subjects with unilateral vestibular hypofunction. *Otology & neurotology : official publication*

- of the American Otological Society, American Neurotology Society [and] European Academy of Otolaryngology and Neurotology.* 2009;30(3):368-372.
13. Dannenbaum E, Paquet N, Hakim-Zadeh R, Feldman AG. Optimal parameters for the clinical test of dynamic visual acuity in patients with a unilateral vestibular deficit. *The Journal of otolaryngology.* 2005;34(1):13-19.
  14. Mirka A, Black FO. Clinical application of dynamic posturography for evaluating sensory integration and vestibular dysfunction. *Neurol Clin.* 1990;8(2):351-359.
  15. Wrisley DM, Marchetti GF, Kuharsky DK, Whitney SL. Reliability, internal consistency, and validity of data obtained with the functional gait assessment. *Phys Ther.* 2004;84(10):906-918.
  16. Mancini M, King L, Salarian A, Holmstrom L, McNames J, Horak FB. Mobility Lab to Assess Balance and Gait with Synchronized Body-worn Sensors. *J Bioeng Biomed Sci.* 2011;Suppl 1:007.
